# Supplementary material for: Value of preoperative risk adjustment in congenital heart surgery (RACHS) score versus the vasoactive-ventilation-renal (VVR) score for predicting postoperative outcomes in neonates and children
Source: Research Square preprint supplement (doi:10.21203/rs.3.rs-3969367/v1), 2024-02-28
Supplement: Supplementary file 1 [file 61ee1b34687024d7b3b13390.docx]

**Appendix**


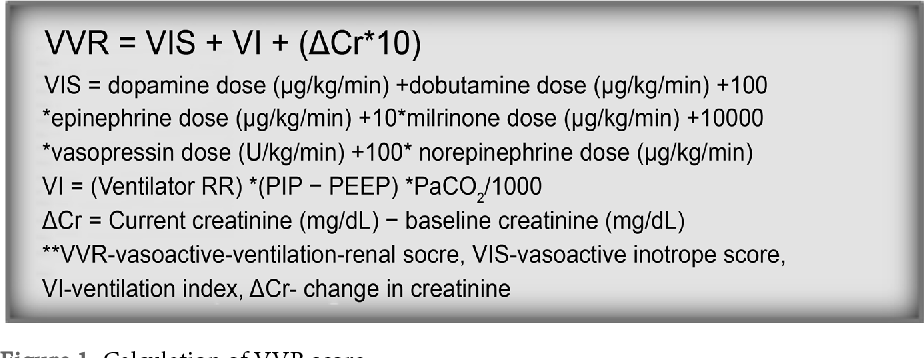


Figure : Calculation of VVR score.


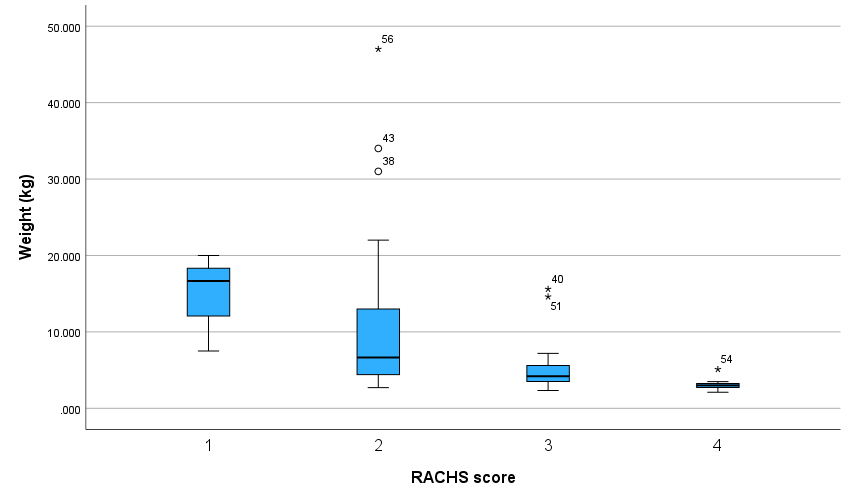


Figure 7: box plot of RACHS score with weight (kg)


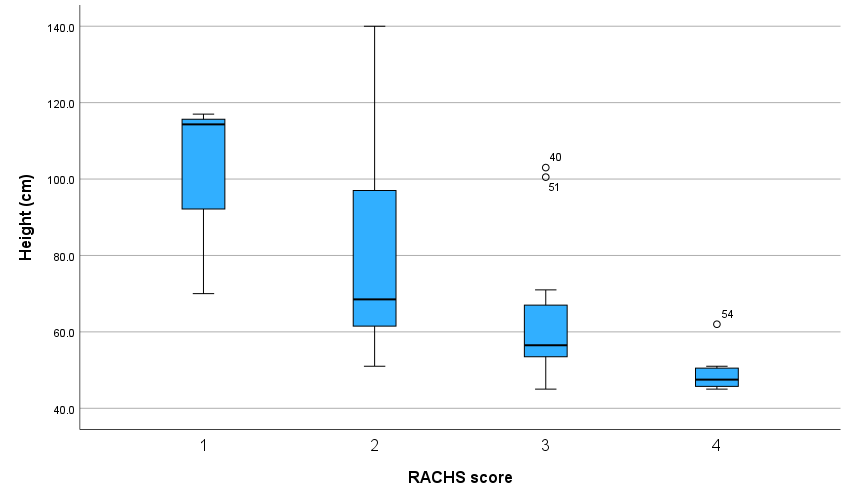


Figure 8: box plot of RACHS score with Height (cm)


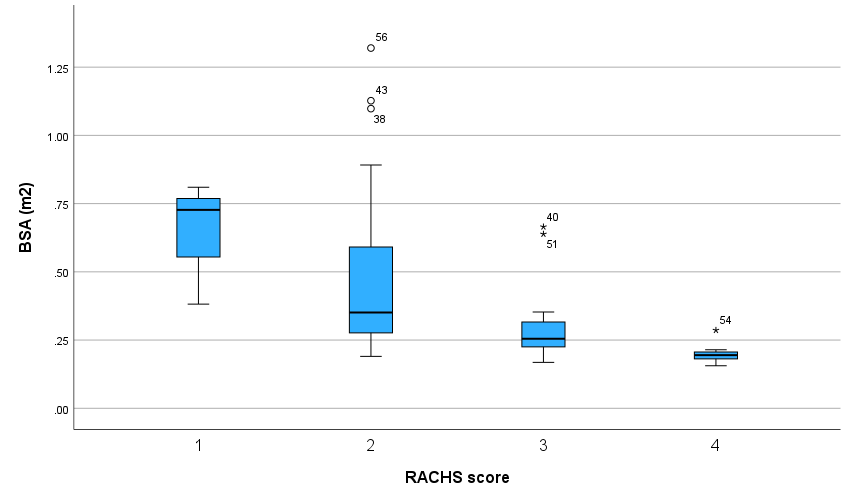


Figure 9: box plot of RACHS score with BSA (m2).


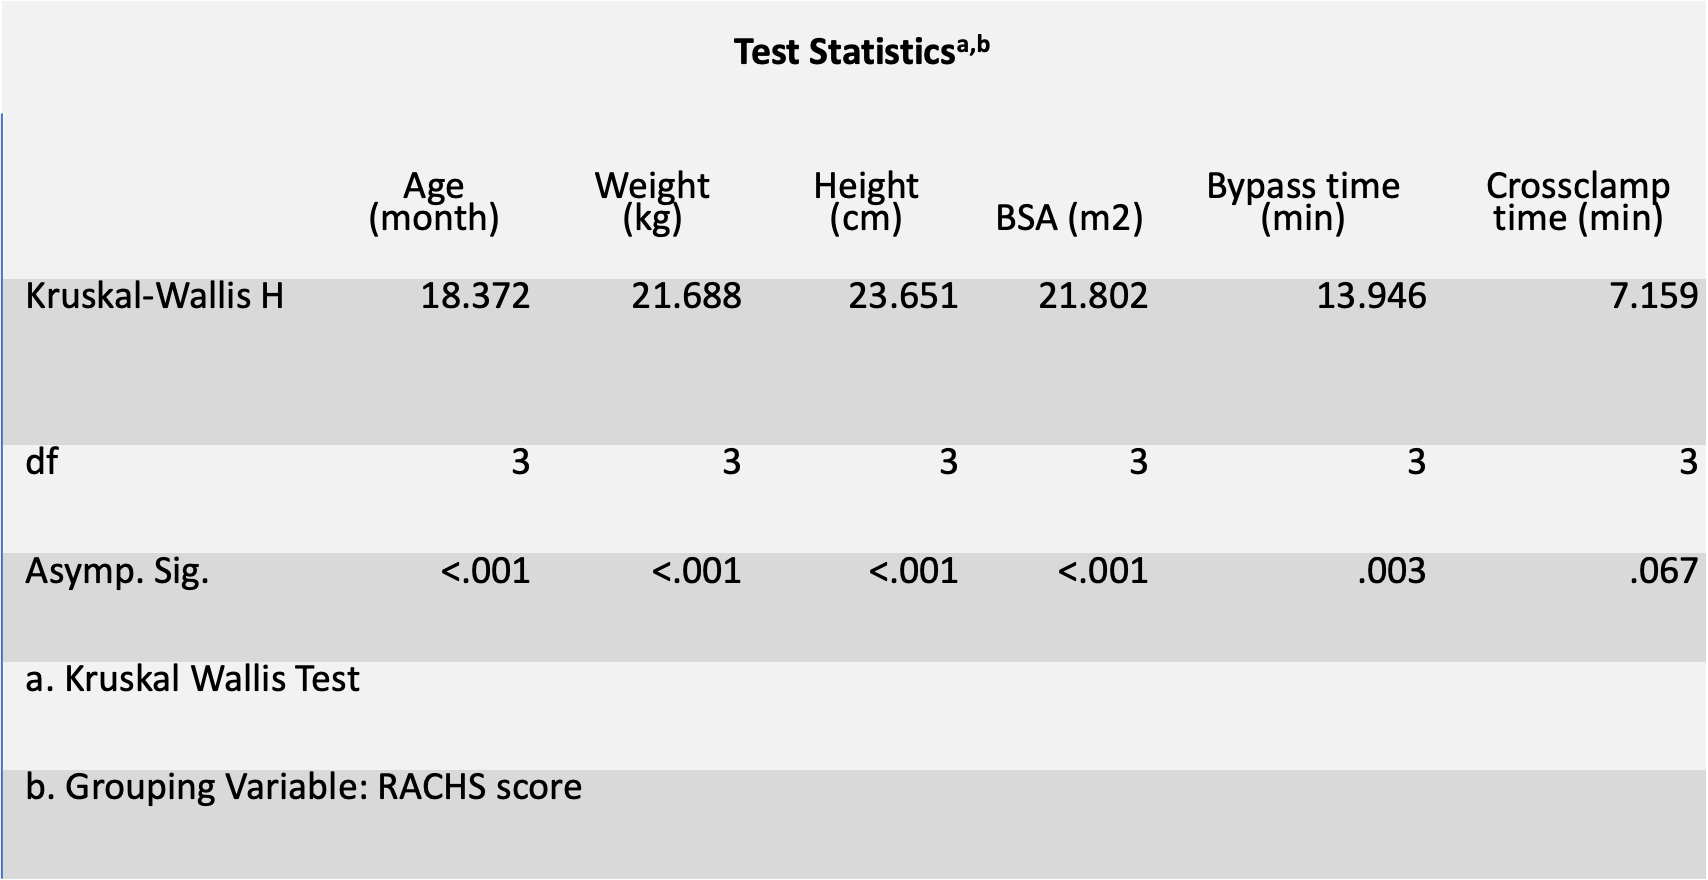


Table 9: Box plot p value for the RACHS score with other parameter.


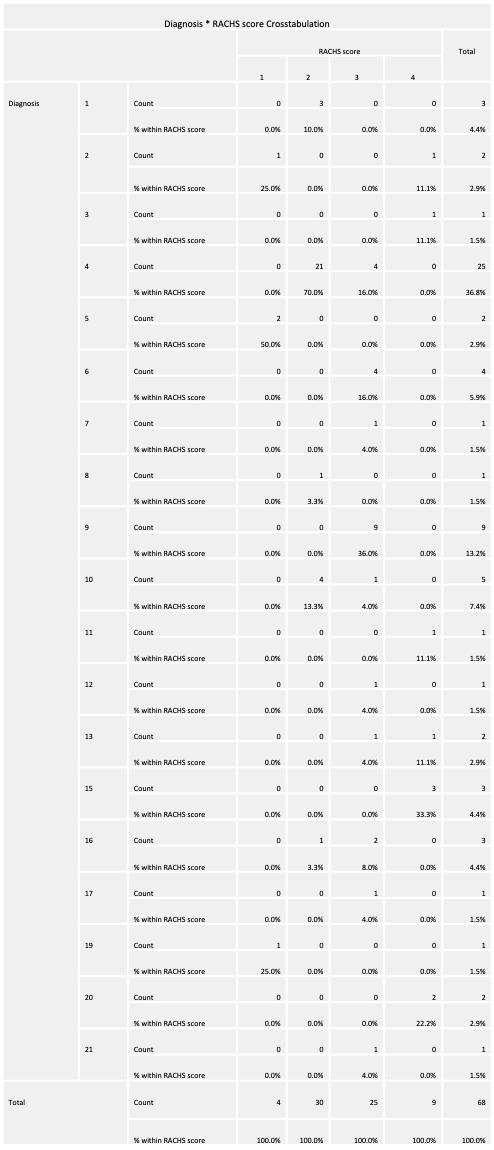


Table 10 association between RACHS and Diagnosis.

| Diagnosis | Frequency | Percent | Cumulative Percent |
| --- | --- | --- | --- |
| 4.VSD | 25 | 36.8 | 36.8 |
| 9.Complete AVSD | 9 | 13.2 | 50.0 |
| 10.TOF | 5 | 7.4 | 57.4 |
| 6.D-TGA with intact IVS | 4 | 5.9 | 63.2 |
| 1.Subaortic Membrane | 3 | 4.4 | 67.6 |
| 15.Interrupted AA | 3 | 4.4 | 72.1 |
| 16.Hypoplastic AA | 3 | 4.4 | 76.5 |
| 2.Coarctation of Aorta | 2 | 2.9 | 79.4 |
| 5.ASD | 2 | 2.9 | 82.4 |
| 13.DILV with L-TGA and hypoplastic AA | 2 | 2.9 | 85.3 |
| 20.Truncus Arteriosus | 2 | 2.9 | 88.2 |
| 3.D-TGA with single ventricle physiology | 1 | 1.5 | 89.7 |
| 7.PA aneurysm | 1 | 1.5 | 91.2 |
| 8.Partial AVSD | 1 | 1.5 | 92.6 |
| 11.D-TGA with DORV, VSD and COA | 1 | 1.5 | 94.1 |
| 12.Tricuspid Atresia with hypoplastic RV | 1 | 1.5 | 95.6 |
| 17.TA with D-TGA | 1 | 1.5 | 97.1 |
| 19.PAPVR | 1 | 1.5 | 98.5 |
| 21.D-TGA with VSD | 1 | 1.5 | 100.0 |
| Total | 68 | 100.0 |  |

Table 11 List of diagnosis and present


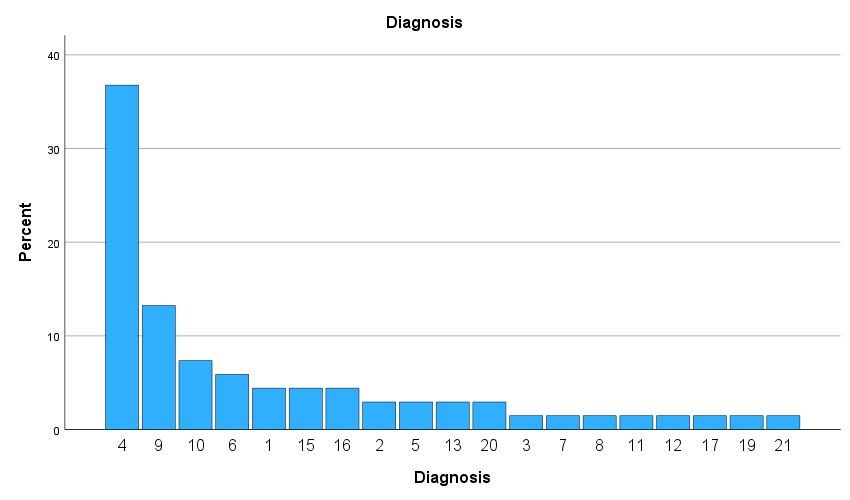


Figure 10 : List of diagnosis

.
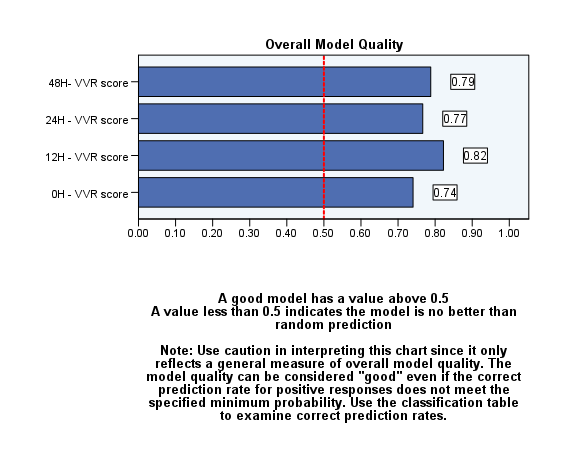


Figure 11: Model quality of VVR score with hospital LOS > 7 days.


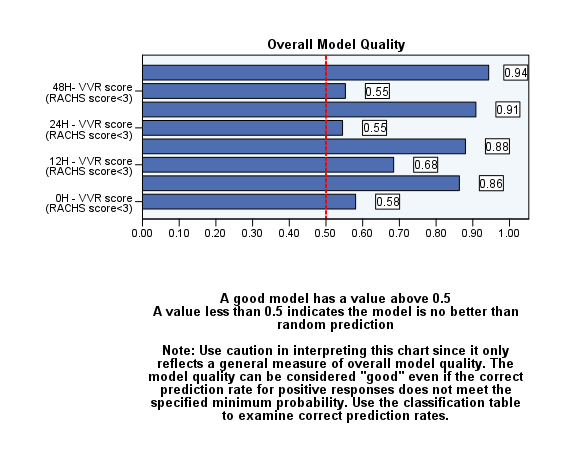


Figure 12: Model quality of VVR score and RACH score < 3 with hospital LOS > 7 days.

Table 13 ROC curve for Hospital LOS > 7 days with VVR score

| **Coordinates of the ROC Curve** | | | |
| --- | --- | --- | --- |
| Test Result Variable(s) | Positive if Greater Than or Equal Toa | Sensitivity | 1 - Specificity |
| 0H - VVR score | -1.000 | 1.000 | 1.000 |
| .400 | 1.000 | .941 |
| .900 | 1.000 | .824 |
| 1.300 | 1.000 | .765 |
| 1.950 | 1.000 | .706 |
| 3.400 | .980 | .706 |
| 4.700 | .980 | .647 |
| 8.700 | .980 | .588 |
| 12.750 | .980 | .529 |
| 13.200 | .980 | .471 |
| 13.600 | .961 | .471 |
| 13.850 | .941 | .471 |
| 14.450 | .922 | .471 |
| 15.750 | .922 | .412 |
| 16.750 | .922 | .353 |
| 17.300 | .922 | .294 |
| 18.050 | .902 | .294 |
| 18.950 | .882 | .294 |
| 19.650 | .882 | .235 |
| 20.200 | .863 | .235 |
| 20.550 | .843 | .235 |
| 20.900 | .824 | .176 |
| 21.950 | .804 | .176 |
| 22.900 | .784 | .176 |
| 23.250 | .765 | .176 |
| 23.450 | .745 | .176 |
| 23.950 | .725 | .176 |
| 24.500 | .706 | .176 |
| 24.950 | .686 | .176 |
| 25.400 | .667 | .176 |
| 26.150 | .647 | .118 |
| 26.850 | .627 | .118 |
| 26.950 | .588 | .118 |
| 27.650 | .569 | .118 |
| 28.950 | .549 | .118 |
| 29.800 | .529 | .118 |
| 30.100 | .529 | .059 |
| 30.800 | .510 | .059 |
| 31.850 | .510 | .000 |
| 32.800 | .490 | .000 |
| 34.050 | .471 | .000 |
| 35.450 | .451 | .000 |
| 36.600 | .431 | .000 |
| 37.350 | .412 | .000 |
| 37.700 | .392 | .000 |
| 38.200 | .373 | .000 |
| 38.800 | .353 | .000 |
| 39.100 | .333 | .000 |
| 39.650 | .314 | .000 |
| 40.200 | .294 | .000 |
| 41.600 | .275 | .000 |
| 43.450 | .255 | .000 |
| 44.150 | .235 | .000 |
| 45.450 | .216 | .000 |
| 46.950 | .196 | .000 |
| 48.750 | .176 | .000 |
| 50.850 | .157 | .000 |
| 54.900 | .137 | .000 |
| 58.950 | .118 | .000 |
| 59.950 | .098 | .000 |
| 60.350 | .078 | .000 |
| 64.150 | .059 | .000 |
| 71.200 | .039 | .000 |
| 78.850 | .020 | .000 |
| 84.200 | .000 | .000 |
| 12H - VVR score | -1.000 | 1.000 | 1.000 |
| 1.400 | 1.000 | .706 |
| 2.900 | 1.000 | .647 |
| 4.000 | .980 | .647 |
| 5.200 | .961 | .647 |
| 5.700 | .961 | .588 |
| 6.500 | .941 | .471 |
| 7.150 | .922 | .294 |
| 7.650 | .922 | .235 |
| 8.400 | .922 | .176 |
| 9.400 | .902 | .176 |
| 11.200 | .882 | .118 |
| 12.700 | .882 | .059 |
| 13.550 | .863 | .059 |
| 14.150 | .843 | .059 |
| 14.250 | .843 | .000 |
| 14.900 | .824 | .000 |
| 15.650 | .804 | .000 |
| 15.850 | .784 | .000 |
| 15.950 | .765 | .000 |
| 16.100 | .745 | .000 |
| 16.300 | .725 | .000 |
| 17.250 | .686 | .000 |
| 18.150 | .667 | .000 |
| 18.400 | .647 | .000 |
| 18.650 | .627 | .000 |
| 19.400 | .608 | .000 |
| 20.300 | .588 | .000 |
| 20.700 | .569 | .000 |
| 21.250 | .549 | .000 |
| 21.650 | .529 | .000 |
| 22.050 | .510 | .000 |
| 22.450 | .490 | .000 |
| 23.250 | .471 | .000 |
| 24.100 | .451 | .000 |
| 24.600 | .431 | .000 |
| 25.850 | .412 | .000 |
| 26.750 | .392 | .000 |
| 26.850 | .353 | .000 |
| 27.100 | .333 | .000 |
| 28.100 | .314 | .000 |
| 29.700 | .294 | .000 |
| 30.750 | .275 | .000 |
| 31.250 | .255 | .000 |
| 31.800 | .235 | .000 |
| 32.750 | .216 | .000 |
| 33.450 | .157 | .000 |
| 35.200 | .137 | .000 |
| 36.950 | .118 | .000 |
| 37.650 | .098 | .000 |
| 44.850 | .078 | .000 |
| 51.800 | .059 | .000 |
| 54.850 | .039 | .000 |
| 62.900 | .020 | .000 |
| 69.300 | .000 | .000 |
| 24H - VVR score | -1.000 | 1.000 | 1.000 |
| .050 | .902 | .647 |
| 1.550 | .902 | .529 |
| 3.300 | .902 | .353 |
| 3.800 | .902 | .294 |
| 4.050 | .902 | .235 |
| 4.550 | .882 | .235 |
| 5.250 | .824 | .176 |
| 5.750 | .804 | .118 |
| 6.500 | .765 | .059 |
| 7.500 | .706 | .000 |
| 8.500 | .686 | .000 |
| 9.050 | .667 | .000 |
| 9.600 | .647 | .000 |
| 10.200 | .627 | .000 |
| 11.150 | .608 | .000 |
| 12.250 | .588 | .000 |
| 13.500 | .569 | .000 |
| 15.050 | .549 | .000 |
| 15.750 | .529 | .000 |
| 16.000 | .510 | .000 |
| 16.200 | .490 | .000 |
| 16.350 | .471 | .000 |
| 16.550 | .451 | .000 |
| 17.100 | .431 | .000 |
| 17.850 | .412 | .000 |
| 19.100 | .392 | .000 |
| 20.550 | .373 | .000 |
| 21.300 | .353 | .000 |
| 21.600 | .333 | .000 |
| 21.950 | .314 | .000 |
| 22.850 | .294 | .000 |
| 24.150 | .275 | .000 |
| 26.000 | .255 | .000 |
| 27.550 | .216 | .000 |
| 27.950 | .196 | .000 |
| 28.100 | .176 | .000 |
| 28.250 | .157 | .000 |
| 28.600 | .137 | .000 |
| 29.900 | .118 | .000 |
| 32.150 | .098 | .000 |
| 33.500 | .078 | .000 |
| 35.300 | .059 | .000 |
| 45.500 | .039 | .000 |
| 57.600 | .020 | .000 |
| 62.200 | .000 | .000 |
| 48H- VVR score | -1.000 | 1.000 | 1.000 |
| .050 | .863 | .118 |
| .250 | .843 | .118 |
| 1.200 | .843 | .059 |
| 2.250 | .824 | .059 |
| 2.550 | .804 | .059 |
| 2.800 | .784 | .059 |
| 3.050 | .667 | .059 |
| 3.450 | .647 | .059 |
| 4.000 | .627 | .059 |
| 4.600 | .627 | .000 |
| 5.400 | .588 | .000 |
| 6.050 | .569 | .000 |
| 6.650 | .549 | .000 |
| 7.500 | .471 | .000 |
| 8.100 | .431 | .000 |
| 8.600 | .412 | .000 |
| 10.100 | .392 | .000 |
| 11.650 | .373 | .000 |
| 12.450 | .353 | .000 |
| 13.050 | .333 | .000 |
| 15.000 | .314 | .000 |
| 16.800 | .294 | .000 |
| 17.050 | .275 | .000 |
| 17.650 | .255 | .000 |
| 18.650 | .235 | .000 |
| 19.400 | .196 | .000 |
| 20.000 | .176 | .000 |
| 23.700 | .157 | .000 |
| 27.300 | .137 | .000 |
| 27.750 | .118 | .000 |
| 29.800 | .098 | .000 |
| 31.750 | .078 | .000 |
| 31.950 | .059 | .000 |
| 33.000 | .039 | .000 |
| 35.700 | .020 | .000 |
| 38.500 | .000 | .000 |
| The test result variable(s): 0H - VVR score, 12H - VVR score , 24H - VVR score, 48H- VVR score has at least one tie between the positive actual state group and the negative actual state group. | | | |
| a. The smallest cutoff value is the minimum observed test value minus 1, and the largest cutoff value is the maximum observed test value plus 1. All the other cutoff values are the averages of two consecutive ordered observed test values. | | | |

Table 14 ROC curve for Hospital LOS > 7 days with VVR score and RACHS ROC curve

| **Coordinates of the ROC Curve** | | | | |
| --- | --- | --- | --- | --- |
| Test Result Variable(s) | RACHS score | Positive if Greater Than or Equal Toa | Sensitivity | 1 - Specificity |
| 0H - VVR score | < 3.00 | -1.000 | 1.000 | 1.000 |
| .400 | 1.000 | .929 |
| .900 | 1.000 | .786 |
| 1.300 | 1.000 | .714 |
| 1.950 | 1.000 | .643 |
| 3.400 | .950 | .643 |
| 4.700 | .950 | .571 |
| 8.950 | .950 | .500 |
| 13.200 | .950 | .429 |
| 13.600 | .900 | .429 |
| 14.400 | .850 | .429 |
| 16.000 | .850 | .357 |
| 17.300 | .850 | .286 |
| 18.050 | .800 | .286 |
| 18.950 | .750 | .286 |
| 19.650 | .750 | .214 |
| 20.250 | .700 | .214 |
| 20.900 | .650 | .214 |
| 21.950 | .600 | .214 |
| 23.100 | .550 | .214 |
| 23.950 | .500 | .214 |
| 24.950 | .450 | .214 |
| 26.200 | .450 | .143 |
| 26.950 | .400 | .143 |
| 28.500 | .350 | .143 |
| 30.700 | .350 | .071 |
| 31.850 | .350 | .000 |
| 33.550 | .300 | .000 |
| 35.950 | .250 | .000 |
| 37.450 | .200 | .000 |
| 38.200 | .150 | .000 |
| 40.750 | .100 | .000 |
| 46.550 | .050 | .000 |
| 51.200 | .000 | .000 |
| >= 3.00 | 11.500 | 1.000 | 1.000 |
| 13.200 | 1.000 | .667 |
| 15.200 | .968 | .667 |
| 18.500 | .968 | .333 |
| 20.550 | .935 | .333 |
| 21.850 | .935 | .000 |
| 23.250 | .903 | .000 |
| 24.000 | .871 | .000 |
| 24.950 | .839 | .000 |
| 25.400 | .806 | .000 |
| 26.150 | .774 | .000 |
| 26.850 | .742 | .000 |
| 27.600 | .710 | .000 |
| 28.950 | .677 | .000 |
| 29.900 | .645 | .000 |
| 31.750 | .613 | .000 |
| 34.700 | .581 | .000 |
| 36.850 | .548 | .000 |
| 38.300 | .516 | .000 |
| 39.100 | .484 | .000 |
| 39.650 | .452 | .000 |
| 40.200 | .419 | .000 |
| 42.150 | .387 | .000 |
| 44.150 | .355 | .000 |
| 45.450 | .323 | .000 |
| 46.950 | .290 | .000 |
| 49.400 | .258 | .000 |
| 54.900 | .226 | .000 |
| 58.950 | .194 | .000 |
| 59.950 | .161 | .000 |
| 60.350 | .129 | .000 |
| 64.150 | .097 | .000 |
| 71.200 | .065 | .000 |
| 78.850 | .032 | .000 |
| 84.200 | .000 | .000 |
| 12H - VVR score | < 3.00 | -1.000 | 1.000 | 1.000 |
| 1.400 | 1.000 | .643 |
| 2.900 | 1.000 | .571 |
| 4.000 | .950 | .571 |
| 5.200 | .900 | .571 |
| 5.700 | .900 | .500 |
| 6.500 | .850 | .429 |
| 7.150 | .800 | .286 |
| 7.650 | .800 | .214 |
| 9.000 | .800 | .143 |
| 11.500 | .750 | .071 |
| 13.600 | .700 | .071 |
| 14.850 | .700 | .000 |
| 15.650 | .650 | .000 |
| 15.850 | .600 | .000 |
| 15.950 | .550 | .000 |
| 16.200 | .500 | .000 |
| 18.650 | .400 | .000 |
| 21.250 | .350 | .000 |
| 24.200 | .300 | .000 |
| 26.850 | .200 | .000 |
| 28.950 | .150 | .000 |
| 32.200 | .100 | .000 |
| 34.400 | .000 | .000 |
| >= 3.00 | 5.000 | 1.000 | 1.000 |
| 6.500 | 1.000 | .667 |
| 7.900 | 1.000 | .333 |
| 10.600 | .968 | .333 |
| 13.250 | .968 | .000 |
| 14.200 | .935 | .000 |
| 15.250 | .903 | .000 |
| 17.150 | .871 | .000 |
| 18.150 | .839 | .000 |
| 18.400 | .806 | .000 |
| 18.650 | .774 | .000 |
| 19.400 | .742 | .000 |
| 20.300 | .710 | .000 |
| 21.100 | .677 | .000 |
| 22.050 | .645 | .000 |
| 22.450 | .613 | .000 |
| 23.250 | .581 | .000 |
| 24.100 | .548 | .000 |
| 24.600 | .516 | .000 |
| 25.850 | .484 | .000 |
| 27.000 | .452 | .000 |
| 28.100 | .419 | .000 |
| 29.700 | .387 | .000 |
| 31.000 | .355 | .000 |
| 31.800 | .323 | .000 |
| 32.750 | .290 | .000 |
| 33.450 | .258 | .000 |
| 35.200 | .226 | .000 |
| 36.950 | .194 | .000 |
| 37.650 | .161 | .000 |
| 44.850 | .129 | .000 |
| 51.800 | .097 | .000 |
| 54.850 | .065 | .000 |
| 62.900 | .032 | .000 |
| 69.300 | .000 | .000 |
| 24H - VVR score | < 3.00 | -1.000 | 1.000 | 1.000 |
| .050 | .750 | .571 |
| 1.550 | .750 | .429 |
| 4.000 | .750 | .286 |
| 5.250 | .650 | .214 |
| 5.750 | .600 | .143 |
| 6.500 | .550 | .071 |
| 7.500 | .500 | .000 |
| 8.500 | .450 | .000 |
| 10.750 | .400 | .000 |
| 13.500 | .350 | .000 |
| 15.200 | .300 | .000 |
| 16.100 | .250 | .000 |
| 16.500 | .200 | .000 |
| 18.350 | .150 | .000 |
| 23.600 | .100 | .000 |
| 27.700 | .050 | .000 |
| 29.200 | .000 | .000 |
| >= 3.00 | 2.000 | 1.000 | 1.000 |
| 3.300 | 1.000 | .667 |
| 3.800 | 1.000 | .333 |
| 4.050 | 1.000 | .000 |
| 4.550 | .968 | .000 |
| 5.500 | .935 | .000 |
| 6.500 | .903 | .000 |
| 8.050 | .839 | .000 |
| 9.600 | .806 | .000 |
| 10.200 | .774 | .000 |
| 11.150 | .742 | .000 |
| 13.800 | .710 | .000 |
| 15.850 | .677 | .000 |
| 16.250 | .645 | .000 |
| 16.950 | .613 | .000 |
| 17.850 | .581 | .000 |
| 19.650 | .548 | .000 |
| 21.300 | .516 | .000 |
| 21.600 | .484 | .000 |
| 21.950 | .452 | .000 |
| 22.850 | .419 | .000 |
| 24.150 | .387 | .000 |
| 26.000 | .355 | .000 |
| 27.550 | .323 | .000 |
| 27.950 | .290 | .000 |
| 28.150 | .258 | .000 |
| 28.600 | .226 | .000 |
| 29.900 | .194 | .000 |
| 32.150 | .161 | .000 |
| 33.500 | .129 | .000 |
| 35.300 | .097 | .000 |
| 45.500 | .065 | .000 |
| 57.600 | .032 | .000 |
| 62.200 | .000 | .000 |
| 48H- VVR score | < 3.00 | -1.000 | 1.000 | 1.000 |
| .200 | .650 | .143 |
| 1.200 | .650 | .071 |
| 2.250 | .600 | .071 |
| 2.550 | .550 | .071 |
| 2.800 | .500 | .071 |
| 3.600 | .300 | .071 |
| 5.250 | .300 | .000 |
| 6.650 | .250 | .000 |
| 7.500 | .150 | .000 |
| 9.600 | .100 | .000 |
| 19.400 | .050 | .000 |
| 28.600 | .000 | .000 |
| >= 3.00 | -1.000 | 1.000 | 1.000 |
| .050 | 1.000 | .000 |
| 1.550 | .968 | .000 |
| 3.050 | .903 | .000 |
| 3.450 | .871 | .000 |
| 4.400 | .839 | .000 |
| 5.400 | .774 | .000 |
| 6.400 | .742 | .000 |
| 7.500 | .677 | .000 |
| 8.100 | .645 | .000 |
| 8.600 | .613 | .000 |
| 10.550 | .581 | .000 |
| 12.450 | .548 | .000 |
| 13.050 | .516 | .000 |
| 15.000 | .484 | .000 |
| 16.800 | .452 | .000 |
| 17.050 | .419 | .000 |
| 17.650 | .387 | .000 |
| 18.650 | .355 | .000 |
| 19.400 | .290 | .000 |
| 20.000 | .258 | .000 |
| 23.700 | .226 | .000 |
| 27.450 | .194 | .000 |
| 29.800 | .161 | .000 |
| 31.750 | .129 | .000 |
| 31.950 | .097 | .000 |
| 33.000 | .065 | .000 |
| 35.700 | .032 | .000 |
| 38.500 | .000 | .000 |
| The test result variable(s): 12H - VVR score , 24H - VVR score, 48H- VVR score has at least one tie between the positive actual state group and the negative actual state group. | | | | |
| a. The smallest cutoff value is the minimum observed test value minus 1, and the largest cutoff value is the maximum observed test value plus 1. All the other cutoff values are the averages of two consecutive ordered observed test values. | | | | |

Table 15 ROC curve for ICU LOS > 5 days with VVR score

| **Coordinates of the ROC Curve** | | | |
| --- | --- | --- | --- |
| Test Result Variable(s) | Positive if Greater Than or Equal Toa | Sensitivity | 1 - Specificity |
| 0H - VVR score | -1.000 | 1.000 | 1.000 |
| .400 | 1.000 | .969 |
| .900 | 1.000 | .906 |
| 1.300 | 1.000 | .875 |
| 1.950 | 1.000 | .844 |
| 3.400 | 1.000 | .813 |
| 4.700 | 1.000 | .781 |
| 8.700 | 1.000 | .750 |
| 12.750 | 1.000 | .719 |
| 13.200 | 1.000 | .688 |
| 13.600 | 1.000 | .656 |
| 13.850 | .972 | .656 |
| 14.450 | .944 | .656 |
| 15.750 | .944 | .625 |
| 16.750 | .944 | .594 |
| 17.300 | .944 | .563 |
| 18.050 | .944 | .531 |
| 18.950 | .944 | .500 |
| 19.650 | .944 | .469 |
| 20.200 | .917 | .469 |
| 20.550 | .917 | .438 |
| 20.900 | .917 | .375 |
| 21.950 | .889 | .375 |
| 22.900 | .889 | .344 |
| 23.250 | .889 | .313 |
| 23.450 | .861 | .313 |
| 23.950 | .861 | .281 |
| 24.500 | .833 | .281 |
| 24.950 | .806 | .281 |
| 25.400 | .806 | .250 |
| 26.150 | .778 | .219 |
| 26.850 | .750 | .219 |
| 26.950 | .722 | .188 |
| 27.650 | .694 | .188 |
| 28.950 | .694 | .156 |
| 29.800 | .667 | .156 |
| 30.100 | .667 | .125 |
| 30.800 | .639 | .125 |
| 31.850 | .639 | .094 |
| 32.800 | .639 | .063 |
| 34.050 | .611 | .063 |
| 35.450 | .611 | .031 |
| 36.600 | .583 | .031 |
| 37.350 | .556 | .031 |
| 37.700 | .528 | .031 |
| 38.200 | .500 | .031 |
| 38.800 | .472 | .031 |
| 39.100 | .444 | .031 |
| 39.650 | .417 | .031 |
| 40.200 | .389 | .031 |
| 41.600 | .361 | .031 |
| 43.450 | .333 | .031 |
| 44.150 | .306 | .031 |
| 45.450 | .278 | .031 |
| 46.950 | .250 | .031 |
| 48.750 | .250 | .000 |
| 50.850 | .222 | .000 |
| 54.900 | .194 | .000 |
| 58.950 | .167 | .000 |
| 59.950 | .139 | .000 |
| 60.350 | .111 | .000 |
| 64.150 | .083 | .000 |
| 71.200 | .056 | .000 |
| 78.850 | .028 | .000 |
| 84.200 | .000 | .000 |
| 12H - VVR score | -1.000 | 1.000 | 1.000 |
| 1.400 | 1.000 | .844 |
| 2.900 | 1.000 | .813 |
| 4.000 | 1.000 | .781 |
| 5.200 | .972 | .781 |
| 5.700 | .972 | .750 |
| 6.500 | .972 | .656 |
| 7.150 | .972 | .531 |
| 7.650 | .972 | .500 |
| 8.400 | .972 | .469 |
| 9.400 | .944 | .469 |
| 11.200 | .944 | .406 |
| 12.700 | .944 | .375 |
| 13.550 | .944 | .344 |
| 14.150 | .944 | .313 |
| 14.250 | .944 | .281 |
| 14.900 | .944 | .250 |
| 15.650 | .944 | .219 |
| 15.850 | .944 | .188 |
| 15.950 | .917 | .188 |
| 16.100 | .889 | .188 |
| 16.300 | .861 | .188 |
| 17.250 | .806 | .188 |
| 18.150 | .806 | .156 |
| 18.400 | .778 | .156 |
| 18.650 | .778 | .125 |
| 19.400 | .750 | .125 |
| 20.300 | .722 | .125 |
| 20.700 | .694 | .125 |
| 21.250 | .667 | .125 |
| 21.650 | .639 | .125 |
| 22.050 | .611 | .125 |
| 22.450 | .583 | .125 |
| 23.250 | .583 | .094 |
| 24.100 | .556 | .094 |
| 24.600 | .528 | .094 |
| 25.850 | .500 | .094 |
| 26.750 | .472 | .094 |
| 26.850 | .444 | .063 |
| 27.100 | .444 | .031 |
| 28.100 | .417 | .031 |
| 29.700 | .389 | .031 |
| 30.750 | .361 | .031 |
| 31.250 | .333 | .031 |
| 31.800 | .306 | .031 |
| 32.750 | .278 | .031 |
| 33.450 | .222 | .000 |
| 35.200 | .194 | .000 |
| 36.950 | .167 | .000 |
| 37.650 | .139 | .000 |
| 44.850 | .111 | .000 |
| 51.800 | .083 | .000 |
| 54.850 | .056 | .000 |
| 62.900 | .028 | .000 |
| 69.300 | .000 | .000 |
| 24H - VVR score | -1.000 | 1.000 | 1.000 |
| .050 | .972 | .688 |
| 1.550 | .972 | .625 |
| 3.300 | .972 | .531 |
| 3.800 | .972 | .500 |
| 4.050 | .972 | .469 |
| 4.550 | .944 | .469 |
| 5.250 | .944 | .344 |
| 5.750 | .944 | .281 |
| 6.500 | .889 | .250 |
| 7.500 | .806 | .219 |
| 8.500 | .778 | .219 |
| 9.050 | .778 | .188 |
| 9.600 | .750 | .188 |
| 10.200 | .722 | .188 |
| 11.150 | .722 | .156 |
| 12.250 | .722 | .125 |
| 13.500 | .694 | .125 |
| 15.050 | .667 | .125 |
| 15.750 | .667 | .094 |
| 16.000 | .639 | .094 |
| 16.200 | .639 | .063 |
| 16.350 | .639 | .031 |
| 16.550 | .611 | .031 |
| 17.100 | .583 | .031 |
| 17.850 | .556 | .031 |
| 19.100 | .528 | .031 |
| 20.550 | .500 | .031 |
| 21.300 | .472 | .031 |
| 21.600 | .444 | .031 |
| 21.950 | .417 | .031 |
| 22.850 | .389 | .031 |
| 24.150 | .361 | .031 |
| 26.000 | .333 | .031 |
| 27.550 | .306 | .000 |
| 27.950 | .278 | .000 |
| 28.100 | .250 | .000 |
| 28.250 | .222 | .000 |
| 28.600 | .194 | .000 |
| 29.900 | .167 | .000 |
| 32.150 | .139 | .000 |
| 33.500 | .111 | .000 |
| 35.300 | .083 | .000 |
| 45.500 | .056 | .000 |
| 57.600 | .028 | .000 |
| 62.200 | .000 | .000 |
| 48H- VVR score | -1.000 | 1.000 | 1.000 |
| .050 | .944 | .375 |
| .250 | .917 | .375 |
| 1.200 | .917 | .344 |
| 2.250 | .889 | .344 |
| 2.550 | .889 | .313 |
| 2.800 | .861 | .313 |
| 3.050 | .806 | .188 |
| 3.450 | .778 | .188 |
| 4.000 | .750 | .188 |
| 4.600 | .750 | .156 |
| 5.400 | .722 | .125 |
| 6.050 | .694 | .125 |
| 6.650 | .667 | .125 |
| 7.500 | .611 | .063 |
| 8.100 | .556 | .063 |
| 8.600 | .556 | .031 |
| 10.100 | .528 | .031 |
| 11.650 | .500 | .031 |
| 12.450 | .500 | .000 |
| 13.050 | .472 | .000 |
| 15.000 | .444 | .000 |
| 16.800 | .417 | .000 |
| 17.050 | .389 | .000 |
| 17.650 | .361 | .000 |
| 18.650 | .333 | .000 |
| 19.400 | .278 | .000 |
| 20.000 | .250 | .000 |
| 23.700 | .222 | .000 |
| 27.300 | .194 | .000 |
| 27.750 | .167 | .000 |
| 29.800 | .139 | .000 |
| 31.750 | .111 | .000 |
| 31.950 | .083 | .000 |
| 33.000 | .056 | .000 |
| 35.700 | .028 | .000 |
| 38.500 | .000 | .000 |
| The test result variable(s): 0H - VVR score, 12H - VVR score , 24H - VVR score, 48H- VVR score has at least one tie between the positive actual state group and the negative actual state group. | | | |
| a. The smallest cutoff value is the minimum observed test value minus 1, and the largest cutoff value is the maximum observed test value plus 1. All the other cutoff values are the averages of two consecutive ordered observed test values. | | | |

Table 16 ROC curve for ICU LOS > 5 days with VVR score and RACHS ROC curve

| **Coordinates of the ROC Curve** | | | | |
| --- | --- | --- | --- | --- |
| Test Result Variable(s) | RACHS score | Positive if Greater Than or Equal Toa | Sensitivity | 1 - Specificity |
| 0H - VVR score | < 3.00 | -1.000 | 1.000 | 1.000 |
| .400 | 1.000 | .958 |
| .900 | 1.000 | .875 |
| 1.300 | 1.000 | .833 |
| 1.950 | 1.000 | .792 |
| 3.400 | 1.000 | .750 |
| 4.700 | 1.000 | .708 |
| 8.950 | 1.000 | .667 |
| 13.200 | 1.000 | .625 |
| 13.600 | 1.000 | .583 |
| 14.400 | .900 | .583 |
| 16.000 | .900 | .542 |
| 17.300 | .900 | .500 |
| 18.050 | .900 | .458 |
| 18.950 | .900 | .417 |
| 19.650 | .900 | .375 |
| 20.250 | .800 | .375 |
| 20.900 | .800 | .333 |
| 21.950 | .700 | .333 |
| 23.100 | .700 | .292 |
| 23.950 | .700 | .250 |
| 24.950 | .600 | .250 |
| 26.200 | .600 | .208 |
| 26.950 | .600 | .167 |
| 28.500 | .500 | .167 |
| 30.700 | .500 | .125 |
| 31.850 | .500 | .083 |
| 33.550 | .500 | .042 |
| 35.950 | .500 | .000 |
| 37.450 | .400 | .000 |
| 38.200 | .300 | .000 |
| 40.750 | .200 | .000 |
| 46.550 | .100 | .000 |
| 51.200 | .000 | .000 |
| >= 3.00 | 11.500 | 1.000 | 1.000 |
| 13.200 | 1.000 | .875 |
| 15.200 | .962 | .875 |
| 18.500 | .962 | .750 |
| 20.550 | .962 | .625 |
| 21.850 | .962 | .500 |
| 23.250 | .962 | .375 |
| 24.000 | .923 | .375 |
| 24.950 | .885 | .375 |
| 25.400 | .885 | .250 |
| 26.150 | .846 | .250 |
| 26.850 | .808 | .250 |
| 27.600 | .769 | .250 |
| 28.950 | .769 | .125 |
| 29.900 | .731 | .125 |
| 31.750 | .692 | .125 |
| 34.700 | .654 | .125 |
| 36.850 | .615 | .125 |
| 38.300 | .577 | .125 |
| 39.100 | .538 | .125 |
| 39.650 | .500 | .125 |
| 40.200 | .462 | .125 |
| 42.150 | .423 | .125 |
| 44.150 | .385 | .125 |
| 45.450 | .346 | .125 |
| 46.950 | .308 | .125 |
| 49.400 | .308 | .000 |
| 54.900 | .269 | .000 |
| 58.950 | .231 | .000 |
| 59.950 | .192 | .000 |
| 60.350 | .154 | .000 |
| 64.150 | .115 | .000 |
| 71.200 | .077 | .000 |
| 78.850 | .038 | .000 |
| 84.200 | .000 | .000 |
| 12H - VVR score | < 3.00 | -1.000 | 1.000 | 1.000 |
| 1.400 | 1.000 | .792 |
| 2.900 | 1.000 | .750 |
| 4.000 | 1.000 | .708 |
| 5.200 | .900 | .708 |
| 5.700 | .900 | .667 |
| 6.500 | .900 | .583 |
| 7.150 | .900 | .458 |
| 7.650 | .900 | .417 |
| 9.000 | .900 | .375 |
| 11.500 | .900 | .292 |
| 13.600 | .900 | .250 |
| 14.850 | .900 | .208 |
| 15.650 | .900 | .167 |
| 15.850 | .900 | .125 |
| 15.950 | .800 | .125 |
| 16.200 | .700 | .125 |
| 18.650 | .500 | .125 |
| 21.250 | .400 | .125 |
| 24.200 | .300 | .125 |
| 26.850 | .200 | .083 |
| 28.950 | .200 | .042 |
| 32.200 | .100 | .042 |
| 34.400 | .000 | .000 |
| >= 3.00 | 5.000 | 1.000 | 1.000 |
| 6.500 | 1.000 | .875 |
| 7.900 | 1.000 | .750 |
| 10.600 | .962 | .750 |
| 13.250 | .962 | .625 |
| 14.200 | .962 | .500 |
| 15.250 | .962 | .375 |
| 17.150 | .923 | .375 |
| 18.150 | .923 | .250 |
| 18.400 | .885 | .250 |
| 18.650 | .885 | .125 |
| 19.400 | .846 | .125 |
| 20.300 | .808 | .125 |
| 21.100 | .769 | .125 |
| 22.050 | .731 | .125 |
| 22.450 | .692 | .125 |
| 23.250 | .692 | .000 |
| 24.100 | .654 | .000 |
| 24.600 | .615 | .000 |
| 25.850 | .577 | .000 |
| 27.000 | .538 | .000 |
| 28.100 | .500 | .000 |
| 29.700 | .462 | .000 |
| 31.000 | .423 | .000 |
| 31.800 | .385 | .000 |
| 32.750 | .346 | .000 |
| 33.450 | .308 | .000 |
| 35.200 | .269 | .000 |
| 36.950 | .231 | .000 |
| 37.650 | .192 | .000 |
| 44.850 | .154 | .000 |
| 51.800 | .115 | .000 |
| 54.850 | .077 | .000 |
| 62.900 | .038 | .000 |
| 69.300 | .000 | .000 |
| 24H - VVR score | < 3.00 | -1.000 | 1.000 | 1.000 |
| .050 | .900 | .583 |
| 1.550 | .900 | .500 |
| 4.000 | .900 | .417 |
| 5.250 | .900 | .292 |
| 5.750 | .900 | .208 |
| 6.500 | .800 | .167 |
| 7.500 | .700 | .125 |
| 8.500 | .600 | .125 |
| 10.750 | .600 | .083 |
| 13.500 | .500 | .083 |
| 15.200 | .400 | .083 |
| 16.100 | .300 | .083 |
| 16.500 | .300 | .042 |
| 18.350 | .200 | .042 |
| 23.600 | .100 | .042 |
| 27.700 | .100 | .000 |
| 29.200 | .000 | .000 |
| >= 3.00 | 2.000 | 1.000 | 1.000 |
| 3.300 | 1.000 | .875 |
| 3.800 | 1.000 | .750 |
| 4.050 | 1.000 | .625 |
| 4.550 | .962 | .625 |
| 5.500 | .962 | .500 |
| 6.500 | .923 | .500 |
| 8.050 | .846 | .500 |
| 9.600 | .808 | .500 |
| 10.200 | .769 | .500 |
| 11.150 | .769 | .375 |
| 13.800 | .769 | .250 |
| 15.850 | .769 | .125 |
| 16.250 | .769 | .000 |
| 16.950 | .731 | .000 |
| 17.850 | .692 | .000 |
| 19.650 | .654 | .000 |
| 21.300 | .615 | .000 |
| 21.600 | .577 | .000 |
| 21.950 | .538 | .000 |
| 22.850 | .500 | .000 |
| 24.150 | .462 | .000 |
| 26.000 | .423 | .000 |
| 27.550 | .385 | .000 |
| 27.950 | .346 | .000 |
| 28.150 | .308 | .000 |
| 28.600 | .269 | .000 |
| 29.900 | .231 | .000 |
| 32.150 | .192 | .000 |
| 33.500 | .154 | .000 |
| 35.300 | .115 | .000 |
| 45.500 | .077 | .000 |
| 57.600 | .038 | .000 |
| 62.200 | .000 | .000 |
| 48H- VVR score | < 3.00 | -1.000 | 1.000 | 1.000 |
| .200 | .800 | .292 |
| 1.200 | .800 | .250 |
| 2.250 | .700 | .250 |
| 2.550 | .700 | .208 |
| 2.800 | .600 | .208 |
| 3.600 | .500 | .083 |
| 5.250 | .500 | .042 |
| 6.650 | .400 | .042 |
| 7.500 | .300 | .000 |
| 9.600 | .200 | .000 |
| 19.400 | .100 | .000 |
| 28.600 | .000 | .000 |
| >= 3.00 | -1.000 | 1.000 | 1.000 |
| .050 | 1.000 | .625 |
| 1.550 | .962 | .625 |
| 3.050 | .923 | .500 |
| 3.450 | .885 | .500 |
| 4.400 | .846 | .500 |
| 5.400 | .808 | .375 |
| 6.400 | .769 | .375 |
| 7.500 | .731 | .250 |
| 8.100 | .692 | .250 |
| 8.600 | .692 | .125 |
| 10.550 | .654 | .125 |
| 12.450 | .654 | .000 |
| 13.050 | .615 | .000 |
| 15.000 | .577 | .000 |
| 16.800 | .538 | .000 |
| 17.050 | .500 | .000 |
| 17.650 | .462 | .000 |
| 18.650 | .423 | .000 |
| 19.400 | .346 | .000 |
| 20.000 | .308 | .000 |
| 23.700 | .269 | .000 |
| 27.450 | .231 | .000 |
| 29.800 | .192 | .000 |
| 31.750 | .154 | .000 |
| 31.950 | .115 | .000 |
| 33.000 | .077 | .000 |
| 35.700 | .038 | .000 |
| 38.500 | .000 | .000 |
| The test result variable(s): 12H - VVR score , 24H - VVR score, 48H- VVR score has at least one tie between the positive actual state group and the negative actual state group. | | | | |
| a. The smallest cutoff value is the minimum observed test value minus 1, and the largest cutoff value is the maximum observed test value plus 1. All the other cutoff values are the averages of two consecutive ordered observed test values. | | | | |
